# Supplementary material for: Exploring the genetic variability and diversity of pearl millet core collection germplasm for grain nutritional traits improvement
Source: PubMed Central journal article supplement (PMC7713302; doi:10.1038/s41598-020-77818-0), 2020-12-03
Supplement: 41598_2020_77818_MOESM1_ESM.pdf [file 41598_2020_77818_MOESM1_ESM.pdf]

## **Exploring the genetic variability and diversity of pearl millet core collection germplasm for grain micronutrients improvement**

Mahalingam Govindaraj<sup>1\*</sup>, Kedar N Rai<sup>1</sup>, Anand Kanatti<sup>1</sup>, Hari D Upadhyaya<sup>1,2</sup>, Harshad Shivade<sup>1</sup> and Aluri S Rao<sup>1</sup>

<sup>1</sup> International Crops Research Institute for the Semi-Arid Tropics (ICRISAT), Patancheru 502 324, Telangana, India.

<sup>2</sup>Center of Excellence for Advanced Materials Research, King Abdulaziz University Jeddah 21589, Saudi Arabia.

\*Corresponding author ([m.govindaraj@cgiar.org](mailto:m.govindaraj@cgiar.org))

**Supplemental Table S1. Pearl millet core collection accessions (504) originated from different countries obtained from Genebank, ICRISAT, Patancheru**

| <b>S. No.</b> | <b>Accession identifier</b> | <b>Country of origin</b> | <b>Part of Core</b> | <b>Bloom (days)<br/>(Mean of two sets)</b> |
|---------------|-----------------------------|--------------------------|---------------------|--------------------------------------------|
| 1             | IP 3689                     | India                    | Yes                 | 46                                         |
| 2             | IP 3926                     | India                    | Yes                 | 48                                         |
| 3             | IP 3940                     | India                    | Yes                 | 49                                         |
| 4             | IP 3999                     | India                    | Yes                 | 47                                         |
| 5             | IP 4039                     | India                    | Yes                 | 49                                         |
| 6             | IP 4066                     | India                    | Yes                 | 48                                         |
| 7             | IP 4150                     | India                    | Yes                 | 45                                         |
| 8             | IP 4169                     | India                    | Yes                 | 50                                         |
| 9             | IP 4197                     | India                    | Yes                 | 50                                         |
| 10            | IP 4291                     | India                    | Yes                 | 48                                         |
| 11            | IP 4299                     | India                    | Yes                 | 49                                         |
| 12            | IP 4979                     | Nigeria                  | Yes                 | 51                                         |
| 13            | IP 6125                     | Cameroon                 | Yes                 | 59                                         |
| 14            | IP 6146                     | Cameroon                 | Yes                 | 61                                         |
| 15            | IP 6179                     | Cameroon                 | Yes                 | 61                                         |
| 16            | IP 6202                     | Cameroon                 | Yes                 | *                                          |
| 17            | IP 6212                     | Cameroon                 | Yes                 | *                                          |
| 18            | IP 6396                     | Mali                     | Yes                 | *                                          |
| 19            | IP 6554                     | Mali                     | Yes                 | 62                                         |
| 20            | IP 6584                     | Malawi                   | Yes                 | 56                                         |
| 21            | IP 6604                     | Malawi                   | Yes                 | 56                                         |
| 22            | IP 6745                     | Malawi                   | Yes                 | 55                                         |
| 23            | IP 6769                     | Malawi                   | Yes                 | 61                                         |
| 24            | IP 6869                     | Kenya                    | Yes                 | 61                                         |
| 25            | IP 6882                     | Kenya                    | Yes                 | 58                                         |
| 26            | IP 7633                     | India                    | Yes                 | 51                                         |
| 27            | IP 9407                     | Ghana                    | Yes                 | 49                                         |
| 28            | IP 9416                     | Ghana                    | Yes                 | 48                                         |
| 29            | IP 9426                     | Ghana                    | Yes                 | 50                                         |
| 30            | IP 9840                     | Sudan                    | Yes                 | 48                                         |
| 31            | IP 10076                    | Mali                     | Yes                 | 58                                         |
| 32            | IP 10186                    | Mali                     | Yes                 | 56                                         |
| 33            | IP 10202                    | Mali                     | Yes                 | 58                                         |
| 34            | IP 10230                    | Mali                     | Yes                 | 52                                         |
| 35            | IP 10394                    | India                    | Yes                 | 50                                         |
| 36            | IP 10587                    | Mali                     | Yes                 | 62                                         |
| 37            | IP 10811                    | Sudan                    | Yes                 | 56                                         |
| 38            | IP 10820                    | Sudan                    | Yes                 | 58                                         |
| 39            | IP 10839                    | Sudan                    | Yes                 | 58                                         |
| 40            | IP 12570                    | India                    | Yes                 | 45                                         |
| 41            | IP 12650                    | India                    | Yes                 | 47                                         |
| 42            | IP 12901                    | Cameroon                 | Yes                 | 59                                         |
| 43            | IP 12925                    | Ghana                    | Yes                 | 50                                         |
| 44            | IP 12939                    | Ghana                    | Yes                 | 46                                         |
| 45            | IP 13150                    | Niger                    | Yes                 | 60                                         |
| 46            | IP 13557                    | India                    | Yes                 | 51                                         |

**Supplemental Table S1. Pearl millet core collection accessions (504) originated from different countries obtained from Genebank, ICRISAT, Patancheru**

| <b>S. No.</b> | <b>Accession identifier</b> | <b>Country of origin</b> | <b>Part of Core</b> | <b>Bloom (days)<br/>(Mean of two sets)</b> |
|---------------|-----------------------------|--------------------------|---------------------|--------------------------------------------|
| 47            | IP 14926                    | Uganda                   | Yes                 | 55                                         |
| 48            | IP 14940                    | India                    | Yes                 | 58                                         |
| 49            | IP 14943                    | India                    | Yes                 | 52                                         |
| 50            | IP 14991                    | India                    | Yes                 | 57                                         |
| 51            | IP 15002                    | India                    | Yes                 | 58                                         |
| 52            | IP 15010                    | India                    | Yes                 | 47                                         |
| 53            | IP 15413                    | India                    | Yes                 | 50                                         |
| 54            | IP 15553                    | Burkina Faso             | Yes                 | 60                                         |
| 55            | IP 17199                    | Burkina Faso             | Yes                 | 58                                         |
| 56            | IP 17878                    | India                    | Yes                 | 56                                         |
| 57            | IP 18062                    | Pakistan                 | Yes                 | 46                                         |
| 58            | IP 18079                    | Pakistan                 | Yes                 | 52                                         |
| 59            | IP 18090                    | Pakistan                 | Yes                 | 56                                         |
| 60            | IP 18116                    | Pakistan                 | Yes                 | 54                                         |
| 61            | IP 18150                    | Pakistan                 | Yes                 | 49                                         |
| 62            | IP 18157                    | Mali                     | Yes                 | 59                                         |
| 63            | IP 18179                    | Mali                     | Yes                 | 53                                         |
| 64            | IP 18281                    | India                    | Yes                 | 55                                         |
| 65            | IP 18421                    | Namibia                  | Yes                 | 60                                         |
| 66            | IP 18535                    | Namibia                  | Yes                 | 60                                         |
| 67            | IP 18625                    | Namibia                  | Yes                 | 57                                         |
| 68            | IP 18657                    | Namibia                  | Yes                 | 60                                         |
| 69            | IP 18679                    | Namibia                  | Yes                 | 57                                         |
| 70            | IP 18780                    | Namibia                  | Yes                 | 59                                         |
| 71            | IP 18854                    | Namibia                  | Yes                 | 60                                         |
| 72            | IP 19040                    | Namibia                  | Yes                 | 59                                         |
| 73            | IP 19067                    | Namibia                  | Yes                 | 58                                         |
| 74            | IP 19072                    | Namibia                  | Yes                 | 57                                         |
| 75            | IP 19078                    | Namibia                  | Yes                 | 60                                         |
| 76            | IP 19141                    | Namibia                  | Yes                 | 55                                         |
| 77            | IP 19160                    | Namibia                  | Yes                 | 58                                         |
| 78            | IP 19175                    | Namibia                  | Yes                 | 60                                         |
| 79            | IP 19246                    | Namibia                  | Yes                 | 59                                         |
| 80            | IP 19263                    | Namibia                  | Yes                 | 59                                         |
| 81            | IP 19405                    | Chad                     | Yes                 | 60                                         |
| 82            | IP 19408                    | Chad                     | Yes                 | *                                          |
| 83            | IP 3106                     | India                    | Yes                 | 56                                         |
| 84            | IP 3122                     | India                    | Yes                 | 60                                         |
| 85            | IP 3125                     | India                    | Yes                 | 49                                         |
| 86            | IP 3138                     | India                    | Yes                 | 48                                         |
| 87            | IP 3150                     | India                    | Yes                 | 49                                         |
| 88            | IP 3171                     | India                    | Yes                 | 49                                         |
| 89            | IP 3183                     | India                    | Yes                 | 46                                         |
| 90            | IP 3284                     | India                    | Yes                 | 54                                         |
| 91            | IP 3329                     | India                    | Yes                 | 54                                         |
| 92            | IP 3432                     | India                    | Yes                 | 49                                         |

**Supplemental Table S1. Pearl millet core collection accessions (504) originated from different countries obtained from Genebank, ICRISAT, Patancheru**

| <b>S. No.</b> | <b>Accession identifier</b> | <b>Country of origin</b> | <b>Part of Core</b> | <b>Bloom (days)<br/>(Mean of two sets)</b> |
|---------------|-----------------------------|--------------------------|---------------------|--------------------------------------------|
| 93            | IP 3799                     | India                    | Yes                 | 50                                         |
| 94            | IP 3811                     | India                    | Yes                 | 51                                         |
| 95            | IP 3865                     | India                    | Yes                 | 54                                         |
| 96            | IP 3890                     | India                    | Yes                 | 52                                         |
| 97            | IP 3963                     | India                    | Yes                 | 47                                         |
| 98            | IP 4120                     | India                    | Yes                 | 53                                         |
| 99            | IP 4454                     | India                    | Yes                 | 58                                         |
| 100           | IP 4466                     | India                    | Yes                 | 54                                         |
| 101           | IP 4634                     | India                    | Yes                 | 53                                         |
| 102           | IP 4759                     | India                    | Yes                 | 63                                         |
| 103           | IP 4828                     | India                    | Yes                 | 56                                         |
| 104           | IP 4952                     | Uganda                   | Yes                 | 59                                         |
| 105           | IP 5389                     | Niger                    | Yes                 | 64                                         |
| 106           | IP 5900                     | Senegal                  | Yes                 | 61                                         |
| 107           | IP 6013                     | Senegal                  | Yes                 | 61                                         |
| 108           | IP 6060                     | Central African Republic | Yes                 | *                                          |
| 109           | IP 6148                     | Cameroon                 | Yes                 | *                                          |
| 110           | IP 6310                     | Mali                     | Yes                 | 59                                         |
| 111           | IP 6415                     | Mali                     | Yes                 | 57                                         |
| 112           | IP 6417                     | Mali                     | Yes                 | 58                                         |
| 113           | IP 6451                     | Mali                     | Yes                 | 62                                         |
| 114           | IP 6465                     | Mali                     | Yes                 | 63                                         |
| 115           | IP 6482                     | Mali                     | Yes                 | 61                                         |
| 116           | IP 6530                     | Mali                     | Yes                 | 56                                         |
| 117           | IP 6545                     | Mali                     | Yes                 | *                                          |
| 118           | IP 6567                     | Mali                     | Yes                 | 64                                         |
| 119           | IP 6639                     | Malawi                   | Yes                 | 61                                         |
| 120           | IP 6682                     | Malawi                   | Yes                 | 61                                         |
| 121           | IP 6897                     | India                    | Yes                 | 55                                         |
| 122           | IP 7020                     | India                    | Yes                 | 60                                         |
| 123           | IP 7095                     | India                    | Yes                 | 57                                         |
| 124           | IP 7108                     | India                    | Yes                 | 60                                         |
| 125           | IP 7536                     | India                    | Yes                 | 58                                         |
| 126           | IP 7660                     | India                    | Yes                 | 57                                         |
| 127           | IP 7734                     | India                    | Yes                 | 55                                         |
| 128           | IP 7780                     | India                    | Yes                 | 62                                         |
| 129           | IP 7838                     | India                    | Yes                 | 52                                         |
| 130           | IP 8074                     | India                    | Yes                 | 58                                         |
| 131           | IP 8208                     | India                    | Yes                 | 57                                         |
| 132           | IP 8229                     | India                    | Yes                 | 57                                         |
| 133           | IP 8237                     | India                    | Yes                 | 60                                         |
| 134           | IP 8339                     | India                    | Yes                 | 58                                         |
| 135           | IP 8344                     | India                    | Yes                 | 57                                         |
| 136           | IP 8350                     | India                    | Yes                 | 57                                         |
| 137           | IP 8426                     | Nigeria                  | Yes                 | 58                                         |
| 138           | IP 9077                     | India                    | Yes                 | 58                                         |

**Supplemental Table S1. Pearl millet core collection accessions (504) originated from different countries obtained from Genebank, ICRISAT, Patancheru**

| <b>S. No.</b> | <b>Accession identifier</b> | <b>Country of origin</b> | <b>Part of Core</b> | <b>Bloom (days)<br/>(Mean of two sets)</b> |
|---------------|-----------------------------|--------------------------|---------------------|--------------------------------------------|
| 139           | IP 9242                     | Mali                     | Yes                 | 63                                         |
| 140           | IP 9286                     | Togo                     | Yes                 | 62                                         |
| 141           | IP 9301                     | Togo                     | Yes                 | 52                                         |
| 142           | IP 9351                     | Ghana                    | Yes                 | 50                                         |
| 143           | IP 9496                     | Ghana                    | Yes                 | 46                                         |
| 144           | IP 9572                     | Ghana                    | Yes                 | 55                                         |
| 145           | IP 9969                     | Zambia                   | Yes                 | 60                                         |
| 146           | IP 9971                     | Zambia                   | Yes                 | 63                                         |
| 147           | IP 9981                     | Zambia                   | Yes                 | 61                                         |
| 148           | IP 10085                    | Mali                     | Yes                 | 57                                         |
| 149           | IP 10140                    | Mali                     | Yes                 | *                                          |
| 150           | IP 10273                    | Nigeria                  | Yes                 | 64                                         |
| 151           | IP 10369                    | Nigeria                  | Yes                 | 61                                         |
| 152           | IP 10401                    | India                    | Yes                 | *                                          |
| 153           | IP 10410                    | Togo                     | Yes                 | *                                          |
| 154           | IP 10471                    | Zimbabwe                 | Yes                 | 63                                         |
| 155           | IP 10539                    | Senegal                  | Yes                 | 63                                         |
| 156           | IP 10543                    | Mali                     | Yes                 | 65                                         |
| 157           | IP 10643                    | Mali                     | Yes                 | 65                                         |
| 158           | IP 10652                    | Mali                     | Yes                 | 62                                         |
| 159           | IP 10694                    | Mali                     | Yes                 | 63                                         |
| 160           | IP 10761                    | Sudan                    | Yes                 | 63                                         |
| 161           | IP 10885                    | Sudan                    | Yes                 | 63                                         |
| 162           | IP 11049                    | India                    | Yes                 | 58                                         |
| 163           | IP 11318                    | Burkina Faso             | Yes                 | 57                                         |
| 164           | IP 11358                    | Burkina Faso             | Yes                 | *                                          |
| 165           | IP 11384                    | Burkina Faso             | Yes                 | 62                                         |
| 166           | IP 11389                    | Burkina Faso             | Yes                 | 59                                         |
| 167           | IP 11391                    | Burkina Faso             | Yes                 | 57                                         |
| 168           | IP 11503                    | Burkina Faso             | Yes                 | 56                                         |
| 169           | IP 11505                    | Burkina Faso             | Yes                 | 56                                         |
| 170           | IP 11577                    | Burkina Faso             | Yes                 | 56                                         |
| 171           | IP 11584                    | Burkina Faso             | Yes                 | 60                                         |
| 172           | IP 11680                    | Sudan                    | Yes                 | 57                                         |
| 173           | IP 11784                    | India                    | Yes                 | 52                                         |
| 174           | IP 11875                    | India                    | Yes                 | 49                                         |
| 175           | IP 11893                    | India                    | Yes                 | 58                                         |
| 176           | IP 11961                    | Nigeria                  | Yes                 | 61                                         |
| 177           | IP 11975                    | Nigeria                  | Yes                 | 61                                         |
| 178           | IP 12111                    | Nigeria                  | Yes                 | 55                                         |
| 179           | IP 12116                    | Nigeria                  | Yes                 | 58                                         |
| 180           | IP 12138                    | Nigeria                  | Yes                 | *                                          |
| 181           | IP 12181                    | Nigeria                  | Yes                 | 63                                         |
| 182           | IP 12248                    | Nigeria                  | Yes                 | 63                                         |
| 183           | IP 12282                    | Nigeria                  | Yes                 | 60                                         |
| 184           | IP 12310                    | Nigeria                  | Yes                 | 58                                         |

**Supplemental Table S1. Pearl millet core collection accessions (504) originated from different countries obtained from Genebank, ICRISAT, Patancheru**

| <b>S. No.</b> | <b>Accession identifier</b> | <b>Country of origin</b> | <b>Part of Core</b> | <b>Bloom (days)<br/>(Mean of two sets)</b> |
|---------------|-----------------------------|--------------------------|---------------------|--------------------------------------------|
| 185           | IP 12532                    | India                    | Yes                 | 54                                         |
| 186           | IP 12568                    | India                    | Yes                 | 59                                         |
| 187           | IP 12591                    | India                    | Yes                 | 59                                         |
| 188           | IP 12700                    | India                    | Yes                 | 55                                         |
| 189           | IP 12768                    | India                    | Yes                 | 50                                         |
| 190           | IP 12805                    | India                    | Yes                 | 52                                         |
| 191           | IP 12839                    | Botswana                 | Yes                 | 64                                         |
| 192           | IP 12967                    | Malawi                   | Yes                 | 51                                         |
| 193           | IP 13137                    | Niger                    | Yes                 | 56                                         |
| 194           | IP 13154                    | Niger                    | Yes                 | *                                          |
| 195           | IP 13180                    | Nigeria                  | Yes                 | 63                                         |
| 196           | IP 13290                    | Senegal                  | Yes                 | 64                                         |
| 197           | IP 13384                    | Uganda                   | Yes                 | 53                                         |
| 198           | IP 13459                    | India                    | Yes                 | 57                                         |
| 199           | IP 13482                    | India                    | Yes                 | 58                                         |
| 200           | IP 13565                    | India                    | Yes                 | 58                                         |
| 201           | IP 13645                    | India                    | Yes                 | 56                                         |
| 202           | IP 13900                    | Burkina Faso             | Yes                 | 46                                         |
| 203           | IP 14294                    | Cameroon                 | Yes                 | *                                          |
| 204           | IP 14311                    | Cameroon                 | Yes                 | *                                          |
| 205           | IP 14317                    | Cameroon                 | Yes                 | *                                          |
| 206           | IP 14362                    | Cameroon                 | Yes                 | *                                          |
| 207           | IP 14418                    | Cameroon                 | Yes                 | *                                          |
| 208           | IP 14426                    | Cameroon                 | Yes                 | *                                          |
| 209           | IP 14497                    | Cameroon                 | Yes                 | *                                          |
| 210           | IP 14624                    | Cameroon                 | Yes                 | *                                          |
| 211           | IP 14644                    | Cameroon                 | Yes                 | *                                          |
| 212           | IP 14787                    | Cameroon                 | Yes                 | *                                          |
| 213           | IP 14849                    | Cameroon                 | Yes                 | *                                          |
| 214           | IP 14923                    | Uganda                   | Yes                 | *                                          |
| 215           | IP 14942                    | India                    | Yes                 | 53                                         |
| 216           | IP 15033                    | India                    | Yes                 | 50                                         |
| 217           | IP 15256                    | India                    | Yes                 | 50                                         |
| 218           | IP 15273                    | India                    | Yes                 | 57                                         |
| 219           | IP 15297                    | India                    | Yes                 | 46                                         |
| 220           | IP 15304                    | India                    | Yes                 | 55                                         |
| 221           | IP 15355                    | India                    | Yes                 | 52                                         |
| 222           | IP 15390                    | India                    | Yes                 | 55                                         |
| 223           | IP 15402                    | India                    | Yes                 | 50                                         |
| 224           | IP 15423                    | India                    | Yes                 | 53                                         |
| 225           | IP 15438                    | India                    | Yes                 | 55                                         |
| 226           | IP 15498                    | India                    | Yes                 | 50                                         |
| 227           | IP 15556                    | Burkina Faso             | Yes                 | *                                          |
| 228           | IP 15598                    | Burkina Faso             | Yes                 | 56                                         |
| 229           | IP 15610                    | Burkina Faso             | Yes                 | *                                          |
| 230           | IP 15917                    | Togo                     | Yes                 | 47                                         |

**Supplemental Table S1. Pearl millet core collection accessions (504) originated from different countries obtained from Genebank, ICRISAT, Patancheru**

| <b>S. No.</b> | <b>Accession identifier</b> | <b>Country of origin</b> | <b>Part of Core</b> | <b>Bloom (days)<br/>(Mean of two sets)</b> |
|---------------|-----------------------------|--------------------------|---------------------|--------------------------------------------|
| 231           | IP 15953                    | India                    | Yes                 | 59                                         |
| 232           | IP 16009                    | India                    | Yes                 | 49                                         |
| 233           | IP 16096                    | India                    | Yes                 | 48                                         |
| 234           | IP 16197                    | India                    | Yes                 | 46                                         |
| 235           | IP 16212                    | India                    | Yes                 | 52                                         |
| 236           | IP 17217                    | Burkina Faso             | Yes                 | 56                                         |
| 237           | IP 17314                    | Burkina Faso             | Yes                 | 60                                         |
| 238           | IP 17350                    | Burkina Faso             | Yes                 | 67                                         |
| 239           | IP 17360                    | Burkina Faso             | Yes                 | 65                                         |
| 240           | IP 17462                    | Central African Republic | Yes                 | *                                          |
| 241           | IP 17493                    | Togo                     | Yes                 | *                                          |
| 242           | IP 17566                    | Togo                     | Yes                 | 44                                         |
| 243           | IP 17632                    | Togo                     | Yes                 | 47                                         |
| 244           | IP 17707                    | Togo                     | Yes                 | 47                                         |
| 245           | IP 17978                    | India                    | Yes                 | 46                                         |
| 246           | IP 17979                    | India                    | No                  | 49                                         |
| 247           | IP 18168                    | Mali                     | Yes                 | 55                                         |
| 248           | IP 18246                    | India                    | Yes                 | 60                                         |
| 249           | IP 18389                    | Namibia                  | Yes                 | 63                                         |
| 250           | IP 18500                    | Namibia                  | Yes                 | 65                                         |
| 251           | IP 18621                    | Namibia                  | Yes                 | *                                          |
| 252           | IP 18702                    | Namibia                  | Yes                 | 63                                         |
| 253           | IP 18742                    | Namibia                  | Yes                 | 62                                         |
| 254           | IP 18786                    | Namibia                  | Yes                 | *                                          |
| 255           | IP 18797                    | Namibia                  | Yes                 | 65                                         |
| 256           | IP 18800                    | Namibia                  | Yes                 | 62                                         |
| 257           | IP 18910                    | Namibia                  | Yes                 | 68                                         |
| 258           | IP 18988                    | Namibia                  | Yes                 | 65                                         |
| 259           | IP 19190                    | Namibia                  | Yes                 | 62                                         |
| 260           | IP 19215                    | Namibia                  | Yes                 | 64                                         |
| 261           | IP 19229                    | Namibia                  | Yes                 | 65                                         |
| 262           | IP 19243                    | Namibia                  | Yes                 | *                                          |
| 263           | IP 19299                    | Namibia                  | Yes                 | 63                                         |
| 264           | IP 19305                    | Namibia                  | Yes                 | *                                          |
| 265           | IP 19321                    | Namibia                  | Yes                 | 63                                         |
| 266           | IP 19406                    | Chad                     | Yes                 | 62                                         |
| 267           | IP 3133                     | India                    | Yes                 | 49                                         |
| 268           | IP 3163                     | India                    | Yes                 | 48                                         |
| 269           | IP 3296                     | India                    | Yes                 | 50                                         |
| 270           | IP 3382                     | India                    | Yes                 | 60                                         |
| 271           | IP 3389                     | India                    | Yes                 | 50                                         |
| 272           | IP 3529                     | India                    | Yes                 | 60                                         |
| 273           | IP 3557                     | India                    | Yes                 | 60                                         |
| 274           | IP 3626                     | India                    | Yes                 | 56                                         |
| 275           | IP 3646                     | India                    | Yes                 | 56                                         |
| 276           | IP 3749                     | India                    | Yes                 | 56                                         |

**Supplemental Table S1. Pearl millet core collection accessions (504) originated from different countries obtained from Genebank, ICRISAT, Patancheru**

| <b>S. No.</b> | <b>Accession identifier</b> | <b>Country of origin</b> | <b>Part of Core</b> | <b>Bloom (days)<br/>(Mean of two sets)</b> |
|---------------|-----------------------------|--------------------------|---------------------|--------------------------------------------|
| 277           | IP 4331                     | India                    | Yes                 | 62                                         |
| 278           | IP 4499                     | India                    | Yes                 | 58                                         |
| 279           | IP 4542                     | India                    | Yes                 | 58                                         |
| 280           | IP 4695                     | India                    | Yes                 | 58                                         |
| 281           | IP 4747                     | India                    | Yes                 | 59                                         |
| 282           | IP 4749                     | India                    | Yes                 | 62                                         |
| 283           | IP 4779                     | India                    | Yes                 | 58                                         |
| 284           | IP 4962                     | Uganda                   | Yes                 | 58                                         |
| 285           | IP 4965                     | Uganda                   | Yes                 | 56                                         |
| 286           | IP 5045                     | Nigeria                  | Yes                 | 58                                         |
| 287           | IP 5272                     | Niger                    | Yes                 | 58                                         |
| 288           | IP 5275                     | Niger                    | Yes                 | 57                                         |
| 289           | IP 5316                     | Niger                    | Yes                 | 57                                         |
| 290           | IP 5438                     | Niger                    | Yes                 | 60                                         |
| 291           | IP 5441                     | Niger                    | Yes                 | 58                                         |
| 292           | IP 5477                     | Niger                    | Yes                 | 60                                         |
| 293           | IP 5816                     | Senegal                  | Yes                 | 65                                         |
| 294           | IP 5873                     | Senegal                  | Yes                 | 60                                         |
| 295           | IP 5940                     | Senegal                  | Yes                 | 62                                         |
| 296           | IP 6037                     | Central African Republic | Yes                 | *                                          |
| 297           | IP 6460                     | Mali                     | Yes                 | 60                                         |
| 298           | IP 6461                     | Mali                     | Yes                 | 60                                         |
| 299           | IP 6510                     | Mali                     | Yes                 | *                                          |
| 300           | IP 7112                     | India                    | Yes                 | 58                                         |
| 301           | IP 7118                     | India                    | Yes                 | 59                                         |
| 302           | IP 7208                     | India                    | Yes                 | 57                                         |
| 303           | IP 7470                     | Tanzania                 | Yes                 | *                                          |
| 304           | IP 7487                     | Tanzania                 | Yes                 | *                                          |
| 305           | IP 7762                     | India                    | Yes                 | 53                                         |
| 306           | IP 8086                     | India                    | Yes                 | 56                                         |
| 307           | IP 8130                     | India                    | Yes                 | 58                                         |
| 308           | IP 8198                     | Nigeria                  | Yes                 | 59                                         |
| 309           | IP 8276                     | India                    | Yes                 | 56                                         |
| 310           | IP 8409                     | Nigeria                  | Yes                 | 58                                         |
| 311           | IP 8472                     | Niger                    | Yes                 | 65                                         |
| 312           | IP 8562                     | India                    | Yes                 | 60                                         |
| 313           | IP 8564                     | India                    | Yes                 | 62                                         |
| 314           | IP 8593                     | India                    | Yes                 | 50                                         |
| 315           | IP 8609                     | India                    | Yes                 | 50                                         |
| 316           | IP 8867                     | Zambia                   | Yes                 | 55                                         |
| 317           | IP 8916                     | Senegal                  | Yes                 | 57                                         |
| 318           | IP 8972                     | Togo                     | Yes                 | 50                                         |
| 319           | IP 9140                     | India                    | Yes                 | 60                                         |
| 320           | IP 9149                     | India                    | Yes                 | 59                                         |
| 321           | IP 9595                     | Yemen                    | Yes                 | 62                                         |
| 322           | IP 9692                     | Nigeria                  | Yes                 | 64                                         |



**Supplemental Table S1. Pearl millet core collection accessions (504) originated from different countries obtained from Genebank, ICRISAT, Patancheru**

| <b>S. No.</b> | <b>Accession identifier</b> | <b>Country of origin</b> | <b>Part of Core</b> | <b>Bloom (days)<br/>(Mean of two sets)</b> |
|---------------|-----------------------------|--------------------------|---------------------|--------------------------------------------|
| 323           | IP 9710                     | Nigeria                  | Yes                 | 60                                         |
| 324           | IP 9720                     | Nigeria                  | Yes                 | 58                                         |
| 325           | IP 10300                    | Nigeria                  | Yes                 | 65                                         |
| 326           | IP 10339                    | Nigeria                  | Yes                 | 57                                         |
| 327           | IP 10437                    | Benin                    | Yes                 | *                                          |
| 328           | IP 10456                    | Zimbabwe                 | Yes                 | 60                                         |
| 329           | IP 10486                    | Zimbabwe                 | Yes                 | 60                                         |
| 330           | IP 10488                    | Zimbabwe                 | Yes                 | 59                                         |
| 331           | IP 10705                    | Mali                     | Yes                 | 56                                         |
| 332           | IP 11143                    | India                    | Yes                 | 55                                         |
| 333           | IP 11144                    | India                    | Yes                 | 49                                         |
| 334           | IP 11211                    | India                    | Yes                 | 56                                         |
| 335           | IP 11275                    | Burkina Faso             | Yes                 | 55                                         |
| 336           | IP 11310                    | Burkina Faso             | Yes                 | *                                          |
| 337           | IP 11316                    | Burkina Faso             | Yes                 | 60                                         |
| 338           | IP 11320                    | Burkina Faso             | Yes                 | 52                                         |
| 339           | IP 11353                    | Burkina Faso             | Yes                 | *                                          |
| 340           | IP 11537                    | Burkina Faso             | Yes                 | 56                                         |
| 341           | IP 11593                    | Burkina Faso             | Yes                 | 65                                         |
| 342           | IP 11677                    | Sudan                    | Yes                 | 56                                         |
| 343           | IP 12020                    | Nigeria                  | Yes                 | *                                          |
| 344           | IP 12331                    | Nigeria                  | Yes                 | 60                                         |
| 345           | IP 12338                    | Nigeria                  | Yes                 | 63                                         |
| 346           | IP 12395                    | South Africa             | Yes                 | 60                                         |
| 347           | IP 12464                    | India                    | Yes                 | 55                                         |
| 348           | IP 12474                    | India                    | Yes                 | 55                                         |
| 349           | IP 12507                    | India                    | Yes                 | 49                                         |
| 350           | IP 12627                    | India                    | Yes                 | 60                                         |
| 351           | IP 12669                    | India                    | Yes                 | 57                                         |
| 352           | IP 12682                    | India                    | Yes                 | 61                                         |
| 353           | IP 12779                    | India                    | Yes                 | 58                                         |
| 354           | IP 13075                    | Niger                    | Yes                 | 60                                         |
| 355           | IP 13121                    | Niger                    | Yes                 | 62                                         |
| 356           | IP 13191                    | Nigeria                  | Yes                 | 64                                         |
| 357           | IP 13196                    | Nigeria                  | Yes                 | 58                                         |
| 358           | IP 13280                    | Senegal                  | Yes                 | 62                                         |
| 359           | IP 13370                    | Tanzania                 | Yes                 | *                                          |
| 360           | IP 13833                    | Burkina Faso             | Yes                 | 50                                         |
| 361           | IP 13875                    | Burkina Faso             | Yes                 | *                                          |
| 362           | IP 13878                    | Burkina Faso             | Yes                 | 64                                         |
| 363           | IP 13907                    | Niger                    | Yes                 | 56                                         |
| 364           | IP 13964                    | Zimbabwe                 | Yes                 | 58                                         |
| 365           | IP 14026                    | Zimbabwe                 | Yes                 | 58                                         |
| 366           | IP 14038                    | Zimbabwe                 | Yes                 | 60                                         |
| 367           | IP 14148                    | Zimbabwe                 | Yes                 | 55                                         |
| 368           | IP 14210                    | Cameroon                 | Yes                 | 64                                         |

**Supplemental Table S1. Pearl millet core collection accessions (504) originated from different countries obtained from Genebank, ICRISAT, Patancheru**

| <b>S. No.</b> | <b>Accession identifier</b> | <b>Country of origin</b> | <b>Part of Core</b> | <b>Bloom (days)<br/>(Mean of two sets)</b> |
|---------------|-----------------------------|--------------------------|---------------------|--------------------------------------------|
| 369           | IP 14217                    | Cameroon                 | Yes                 | *                                          |
| 370           | IP 14778                    | Cameroon                 | Yes                 | 64                                         |
| 371           | IP 14918                    | Uganda                   | Yes                 | *                                          |
| 372           | IP 15159                    | India                    | Yes                 | 56                                         |
| 373           | IP 15177                    | India                    | Yes                 | *                                          |
| 374           | IP 15218                    | India                    | Yes                 | 58                                         |
| 375           | IP 15220                    | India                    | Yes                 | 56                                         |
| 376           | IP 15233                    | India                    | Yes                 | 60                                         |
| 377           | IP 15234                    | India                    | Yes                 | 60                                         |
| 378           | IP 15257                    | India                    | Yes                 | 57                                         |
| 379           | IP 15614                    | Burkina Faso             | Yes                 | *                                          |
| 380           | IP 15817                    | Tanzania                 | Yes                 | 59                                         |
| 381           | IP 15872                    | Tanzania                 | Yes                 | *                                          |
| 382           | IP 15899                    | Tanzania                 | Yes                 | 56                                         |
| 383           | IP 16131                    | India                    | Yes                 | 59                                         |
| 384           | IP 16440                    | Zimbabwe                 | Yes                 | 60                                         |
| 385           | IP 16638                    | Zimbabwe                 | Yes                 | 48                                         |
| 386           | IP 17028                    | Zimbabwe                 | Yes                 | 59                                         |
| 387           | IP 17099                    | Zimbabwe                 | Yes                 | 58                                         |
| 388           | IP 17125                    | Zimbabwe                 | Yes                 | 60                                         |
| 389           | IP 17228                    | Burkina Faso             | Yes                 | 55                                         |
| 390           | IP 17407                    | Central African Republic | Yes                 | *                                          |
| 391           | IP 17435                    | Central African Republic | Yes                 | *                                          |
| 392           | IP 17554                    | Togo                     | Yes                 | 49                                         |
| 393           | IP 17620                    | Togo                     | Yes                 | 50                                         |
| 394           | IP 17690                    | Togo                     | Yes                 | 50                                         |
| 395           | IP 17753                    | Togo                     | Yes                 | 50                                         |
| 396           | IP 17945                    | Nigeria                  | Yes                 | 56                                         |
| 397           | IP 18412                    | Namibia                  | Yes                 | 58                                         |
| 398           | IP 18722                    | Namibia                  | Yes                 | *                                          |
| 399           | IP 19344                    | Namibia                  | Yes                 | 60                                         |
| 400           | IP 19361                    | Namibia                  | Yes                 | 58                                         |
| 401           | IP 19388                    | Namibia                  | Yes                 | *                                          |
| 402           | IP 3098                     | India                    | Yes                 | *                                          |
| 403           | IP 4974                     | Nigeria                  | Yes                 | 57                                         |
| 404           | IP 5031                     | Nigeria                  | Yes                 | 59                                         |
| 405           | IP 5056                     | Nigeria                  | Yes                 | 58                                         |
| 406           | IP 5070                     | Nigeria                  | Yes                 | 56                                         |
| 407           | IP 5121                     | Niger                    | Yes                 | 57                                         |
| 408           | IP 5131                     | Niger                    | Yes                 | 60                                         |
| 409           | IP 5153                     | Niger                    | Yes                 | *                                          |
| 410           | IP 5207                     | Niger                    | Yes                 | 55                                         |
| 411           | IP 5221                     | Niger                    | Yes                 | 55                                         |
| 412           | IP 5222                     | Niger                    | Yes                 | 57                                         |
| 413           | IP 5308                     | Niger                    | Yes                 | 63                                         |
| 414           | IP 5396                     | Niger                    | Yes                 | *                                          |

**Supplemental Table S1. Pearl millet core collection accessions (504) originated from different countries obtained from Genebank, ICRISAT, Patancheru**

| <b>S. No.</b> | <b>Accession identifier</b> | <b>Country of origin</b> | <b>Part of Core</b> | <b>Bloom (days)<br/>(Mean of two sets)</b> |
|---------------|-----------------------------|--------------------------|---------------------|--------------------------------------------|
| 415           | IP 5416                     | Niger                    | Yes                 | 60                                         |
| 416           | IP 5419                     | Niger                    | Yes                 | 65                                         |
| 417           | IP 5447                     | Niger                    | Yes                 | 60                                         |
| 418           | IP 5452                     | Niger                    | Yes                 | 64                                         |
| 419           | IP 5455                     | Niger                    | Yes                 | 60                                         |
| 420           | IP 5597                     | Niger                    | Yes                 | *                                          |
| 421           | IP 5603                     | Niger                    | Yes                 | 68                                         |
| 422           | IP 5666                     | Niger                    | Yes                 | 56                                         |
| 423           | IP 5695                     | Nigeria                  | Yes                 | *                                          |
| 424           | IP 5713                     | Nigeria                  | Yes                 | 59                                         |
| 425           | IP 6585                     | Malawi                   | Yes                 | 55                                         |
| 426           | IP 6793                     | Malawi                   | Yes                 | 57                                         |
| 427           | IP 7364                     | Tanzania                 | Yes                 | *                                          |
| 428           | IP 7377                     | Tanzania                 | Yes                 | *                                          |
| 429           | IP 7392                     | Tanzania                 | Yes                 | *                                          |
| 430           | IP 7440                     | Tanzania                 | Yes                 | *                                          |
| 431           | IP 7468                     | Tanzania                 | Yes                 | *                                          |
| 432           | IP 7886                     | India                    | Yes                 | *                                          |
| 433           | IP 7915                     | Niger                    | Yes                 | *                                          |
| 434           | IP 7935                     | India                    | Yes                 | 65                                         |
| 435           | IP 7952                     | India                    | Yes                 | *                                          |
| 436           | IP 8000                     | Botswana                 | Yes                 | *                                          |
| 437           | IP 8069                     | India                    | Yes                 | *                                          |
| 438           | IP 8429                     | Nigeria                  | Yes                 | 56                                         |
| 439           | IP 8540                     | India                    | Yes                 | *                                          |
| 440           | IP 8647                     | Sudan                    | Yes                 | *                                          |
| 441           | IP 8672                     | Sudan                    | Yes                 | *                                          |
| 442           | IP 8786                     | Botswana                 | Yes                 | 58                                         |
| 443           | IP 8818                     | Zimbabwe                 | Yes                 | 64                                         |
| 444           | IP 8863                     | Zambia                   | Yes                 | *                                          |
| 445           | IP 9618                     | India                    | Yes                 | 50                                         |
| 446           | IP 9678                     | Nigeria                  | Yes                 | 56                                         |
| 447           | IP 10290                    | Nigeria                  | Yes                 | *                                          |
| 448           | IP 10423                    | Benin                    | Yes                 | *                                          |
| 449           | IP 10912                    | Sudan                    | Yes                 | *                                          |
| 450           | IP 10945                    | Sudan                    | Yes                 | 60                                         |
| 451           | IP 10953                    | Kenya                    | Yes                 | 51                                         |
| 452           | IP 10964                    | Kenya                    | Yes                 | 50                                         |
| 453           | IP 11218                    | Zimbabwe                 | Yes                 | *                                          |
| 454           | IP 11311                    | Burkina Faso             | Yes                 | 54                                         |
| 455           | IP 11387                    | Burkina Faso             | Yes                 | 65                                         |
| 456           | IP 11454                    | Burkina Faso             | Yes                 | 66                                         |
| 457           | IP 11707                    | Sudan                    | Yes                 | 65                                         |
| 458           | IP 11763                    | South Africa             | Yes                 | *                                          |
| 459           | IP 11765                    | South Africa             | Yes                 | *                                          |
| 460           | IP 11841                    | India                    | Yes                 | *                                          |

**Supplemental Table S1. Pearl millet core collection accessions (504) originated from different countries obtained from Genebank, ICRISAT, Patancheru**

| <b>S. No.</b> | <b>Accession identifier</b> | <b>Country of origin</b> | <b>Part of Core</b> | <b>Bloom (days)<br/>(Mean of two sets)</b> |
|---------------|-----------------------------|--------------------------|---------------------|--------------------------------------------|
| 461           | IP 11930                    | Sierra Leone             | Yes                 | *                                          |
| 462           | IP 11937                    | Sierra Leone             | Yes                 | *                                          |
| 463           | IP 11947                    | Sierra Leone             | Yes                 | *                                          |
| 464           | IP 12848                    | Burkina Faso             | Yes                 | 62                                         |
| 465           | IP 13608                    | India                    | Yes                 | 57                                         |
| 466           | IP 13840                    | Burkina Faso             | Yes                 | *                                          |
| 467           | IP 13885                    | Burkina Faso             | Yes                 | *                                          |
| 468           | IP 13892                    | Burkina Faso             | Yes                 | *                                          |
| 469           | IP 13971                    | Zimbabwe                 | Yes                 | *                                          |
| 470           | IP 14028                    | Zimbabwe                 | Yes                 | 58                                         |
| 471           | IP 14100                    | Zimbabwe                 | Yes                 | 60                                         |
| 472           | IP 14160                    | Zimbabwe                 | Yes                 | 64                                         |
| 473           | IP 14172                    | Zimbabwe                 | Yes                 | 65                                         |
| 474           | IP 15092                    | India                    | Yes                 | *                                          |
| 475           | IP 15372                    | India                    | Yes                 | 57                                         |
| 476           | IP 15681                    | Tanzania                 | Yes                 | *                                          |
| 477           | IP 15710                    | Tanzania                 | Yes                 | *                                          |
| 478           | IP 15829                    | Tanzania                 | Yes                 | *                                          |
| 479           | IP 15857                    | Tanzania                 | Yes                 | *                                          |
| 480           | IP 16289                    | Zimbabwe                 | Yes                 | *                                          |
| 481           | IP 16304                    | Zimbabwe                 | Yes                 | 59                                         |
| 482           | IP 16380                    | Zimbabwe                 | Yes                 | *                                          |
| 483           | IP 16402                    | Zimbabwe                 | Yes                 | 59                                         |
| 484           | IP 16420                    | Zimbabwe                 | Yes                 | 60                                         |
| 485           | IP 16422                    | Zimbabwe                 | Yes                 | 58                                         |
| 486           | IP 16426                    | Zimbabwe                 | Yes                 | 63                                         |
| 487           | IP 16449                    | Zimbabwe                 | Yes                 | 59                                         |
| 488           | IP 16569                    | Zimbabwe                 | Yes                 | 58                                         |
| 489           | IP 16580                    | Zimbabwe                 | Yes                 | 60                                         |
| 490           | IP 16613                    | Zimbabwe                 | Yes                 | 60                                         |
| 491           | IP 16617                    | Zimbabwe                 | Yes                 | 62                                         |
| 492           | IP 16690                    | Zimbabwe                 | Yes                 | *                                          |
| 493           | IP 16770                    | Zimbabwe                 | Yes                 | 59                                         |
| 494           | IP 16791                    | Zimbabwe                 | Yes                 | 65                                         |
| 495           | IP 16820                    | Zimbabwe                 | Yes                 | 60                                         |
| 496           | IP 16911                    | Zimbabwe                 | Yes                 | 66                                         |
| 497           | IP 16937                    | Zimbabwe                 | Yes                 | 61                                         |
| 498           | IP 16968                    | Zimbabwe                 | Yes                 | 57                                         |
| 499           | IP 17006                    | Zimbabwe                 | Yes                 | *                                          |
| 500           | IP 17064                    | Zimbabwe                 | Yes                 | 58                                         |
| 501           | IP 17080                    | Zimbabwe                 | Yes                 | *                                          |
| 502           | IP 17144                    | Zimbabwe                 | Yes                 | 56                                         |
| 503           | IP 18308                    | India                    | Yes                 | *                                          |
| 504           | IP 18318                    | India                    | Yes                 | *                                          |

\* Very late bloom (>70 d) and data not recorded

**Supplemental Table S2. Selected 212 accessions with country of origin and field performance over two crop season**

| S. No. | Accession identifier | Country of origin | Part of Mini Core | Mean of Summer 2011 and Rainy 2011 |                    |                               |                               |
|--------|----------------------|-------------------|-------------------|------------------------------------|--------------------|-------------------------------|-------------------------------|
|        |                      |                   |                   | Bloom (days)                       | TSW (g/1000 grain) | Fe_XRF (mg kg <sup>-1</sup> ) | Zn_XRF (mg kg <sup>-1</sup> ) |
| 1      | IP 3106              | India             | NO                | 54                                 | 11                 | 59                            | 59                            |
| 2      | IP 3122              | India             | NO                | 56                                 | 8                  | 45                            | 37                            |
| 3      | IP 3138              | India             | NO                | 50                                 | 7                  | 44                            | 48                            |
| 4      | IP 3163              | India             | NO                | 51                                 | 7                  | 50                            | 48                            |
| 5      | IP 3183              | India             | NO                | 48                                 | 7                  | 37                            | 42                            |
| 6      | IP 3284              | India             | NO                | 56                                 | 8                  | 48                            | 43                            |
| 7      | IP 3296              | India             | NO                | 50                                 | 11                 | 55                            | 58                            |
| 8      | IP 3329              | India             | YES               | 60                                 | 7                  | 72                            | 61                            |
| 9      | IP 3432              | India             | YES               | 53                                 | 7                  | 44                            | 64                            |
| 10     | IP 3626              | India             | YES               | 52                                 | 9                  | 70                            | 58                            |
| 11     | IP 3749              | India             | NO                | 55                                 | 9                  | 59                            | 65                            |
| 12     | IP 3799              | India             | NO                | 53                                 | 12                 | 64                            | 61                            |
| 13     | IP 3865              | India             | NO                | 55                                 | 7                  | 44                            | 50                            |
| 14     | IP 3890              | India             | NO                | 51                                 | 7                  | 44                            | 48                            |
| 15     | IP 3999              | India             | NO                | 46                                 | 10                 | 41                            | 44                            |
| 16     | IP 4120              | India             | NO                | 54                                 | 10                 | 47                            | 43                            |
| 17     | IP 4197              | India             | NO                | 57                                 | 11                 | 64                            | 47                            |
| 18     | IP 4291              | India             | YES               | 46                                 | 12                 | 46                            | 43                            |
| 19     | IP 4454              | India             | NO                | 56                                 | 9                  | 67                            | 66                            |
| 20     | IP 4466              | India             | NO                | 57                                 | 9                  | 39                            | 43                            |
| 21     | IP 4499              | India             | NO                | 57                                 | 7                  | 42                            | 56                            |
| 22     | IP 4542              | India             | NO                | 50                                 | 7                  | 51                            | 57                            |
| 23     | IP 4695              | India             | NO                | 59                                 | 7                  | 49                            | 37                            |
| 24     | IP 4747              | India             | YES               | 61                                 | 9                  | 75                            | 66                            |
| 25     | IP 4759              | India             | NO                | 53                                 | 9                  | 54                            | 45                            |
| 26     | IP 4779              | India             | NO                | 52                                 | 7                  | 62                            | 45                            |
| 27     | IP 4828              | India             | NO                | 56                                 | 9                  | 48                            | 46                            |
| 28     | IP 4962              | Uganda            | NO                | 52                                 | 12                 | 57                            | 41                            |
| 29     | IP 4974              | Nigeria           | NO                | 57                                 | 8                  | 48                            | 46                            |
| 30     | IP 4979              | Nigeria           | YES               | 52                                 | 11                 | 46                            | 52                            |
| 31     | IP 5031              | Nigeria           | NO                | 63                                 | 7                  | 48                            | 42                            |
| 32     | IP 5045              | Nigeria           | NO                | 52                                 | 12                 | 55                            | 47                            |
| 33     | IP 5056              | Nigeria           | NO                | 59                                 | 9                  | 59                            | 47                            |
| 34     | IP 5070              | Nigeria           | NO                | 55                                 | 11                 | 59                            | 52                            |
| 35     | IP 5131              | Niger             | NO                | 59                                 | 10                 | 51                            | 47                            |
| 36     | IP 5222              | Niger             | NO                | 54                                 | 9                  | 54                            | 46                            |
| 37     | IP 5272              | Niger             | NO                | 56                                 | 8                  | 50                            | 43                            |
| 38     | IP 5316              | Niger             | NO                | 57                                 | 11                 | 60                            | 50                            |
| 39     | IP 5666              | Niger             | NO                | 52                                 | 10                 | 49                            | 41                            |
| 40     | IP 5695              | Nigeria           | NO                | 54                                 | 7                  | 38                            | 34                            |
| 41     | IP 6013              | Senegal           | NO                | 55                                 | 10                 | 51                            | 46                            |

**Supplemental Table S2. Selected 212 accessions with country of origin and field performance over two crop season**

| S. No. | Accession identifier | Country of origin | Part of Mini Core | Mean of Summer 2011 and Rainy 2011 |                    |                               |                               |
|--------|----------------------|-------------------|-------------------|------------------------------------|--------------------|-------------------------------|-------------------------------|
|        |                      |                   |                   | Bloom (days)                       | TSW (g/1000 grain) | Fe_XRF (mg kg <sup>-1</sup> ) | Zn_XRF (mg kg <sup>-1</sup> ) |
| 42     | IP 6530              | Mali              | NO                | 50                                 | 12                 | 52                            | 41                            |
| 43     | IP 6584              | Malawi            | NO                | 51                                 | 8                  | 50                            | 63                            |
| 44     | IP 6639              | Malawi            | NO                | 53                                 | 11                 | 53                            | 50                            |
| 45     | IP 6682              | Malawi            | NO                | 62                                 | 8                  | 35                            | 47                            |
| 46     | IP 6745              | Malawi            | NO                | 50                                 | 12                 | 58                            | 52                            |
| 47     | IP 6793              | Malawi            | NO                | 52                                 | 7                  | 52                            | 50                            |
| 48     | IP 6869              | Kenya             | NO                | 59                                 | 9                  | 57                            | 68                            |
| 49     | IP 6882              | Kenya             | NO                | 60                                 | 7                  | 47                            | 50                            |
| 50     | IP 6897              | India             | NO                | 60                                 | 8                  | 44                            | 45                            |
| 51     | IP 7020              | India             | NO                | 52                                 | 9                  | 50                            | 47                            |
| 52     | IP 7108              | India             | NO                | 58                                 | 8                  | 55                            | 56                            |
| 53     | IP 7118              | India             | YES               | 62                                 | 9                  | 64                            | 51                            |
| 54     | IP 7208              | India             | NO                | 53                                 | 7                  | 69                            | 54                            |
| 55     | IP 7377              | Tanzania          | NO                | 60                                 | 8                  | 44                            | 40                            |
| 56     | IP 7440              | Tanzania          | NO                | 55                                 | 8                  | 40                            | 33                            |
| 57     | IP 7470              | Tanzania          | NO                | 60                                 | 9                  | 56                            | 49                            |
| 58     | IP 7536              | India             | NO                | 58                                 | 7                  | 72                            | 51                            |
| 59     | IP 7633              | India             | NO                | 44                                 | 11                 | 52                            | 48                            |
| 60     | IP 7660              | India             | NO                | 56                                 | 9                  | 49                            | 48                            |
| 61     | IP 7734              | India             | NO                | 53                                 | 9                  | 67                            | 59                            |
| 62     | IP 7762              | India             | NO                | 57                                 | 8                  | 49                            | 39                            |
| 63     | IP 7838              | India             | NO                | 52                                 | 9                  | 83                            | 47                            |
| 64     | IP 8069              | India             | NO                | 69                                 | 9                  | 38                            | 43                            |
| 65     | IP 8074              | India             | YES               | 49                                 | 8                  | 41                            | 38                            |
| 66     | IP 8208              | India             | NO                | 49                                 | 11                 | 60                            | 43                            |
| 67     | IP 8339              | India             | NO                | 53                                 | 10                 | 46                            | 43                            |
| 68     | IP 8344              | India             | NO                | 53                                 | 7                  | 57                            | 51                            |
| 69     | IP 8409              | Nigeria           | NO                | 59                                 | 8                  | 35                            | 41                            |
| 70     | IP 8426              | Nigeria           | NO                | 59                                 | 9                  | 73                            | 54                            |
| 71     | IP 8429              | Nigeria           | NO                | 58                                 | 8                  | 61                            | 56                            |
| 72     | IP 8562              | India             | YES               | 60                                 | 9                  | 47                            | 44                            |
| 73     | IP 8564              | India             | NO                | 59                                 | 9                  | 54                            | 54                            |
| 74     | IP 8593              | India             | NO                | 54                                 | 10                 | 45                            | 35                            |
| 75     | IP 8863              | Zambia            | YES               | 63                                 | 8                  | 41                            | 47                            |
| 76     | IP 8867              | Zambia            | NO                | 49                                 | 8                  | 58                            | 47                            |
| 77     | IP 8972              | Togo              | NO                | 46                                 | 11                 | 90                            | 48                            |
| 78     | IP 9140              | India             | NO                | 59                                 | 8                  | 49                            | 64                            |
| 79     | IP 9286              | Togo              | NO                | 66                                 | 12                 | 76                            | 48                            |
| 80     | IP 9301              | Togo              | NO                | 49                                 | 14                 | 83                            | 59                            |
| 81     | IP 9351              | Ghana             | NO                | 46                                 | 15                 | 69                            | 51                            |
| 82     | IP 9407              | Ghana             | NO                | 45                                 | 14                 | 66                            | 48                            |

**Supplemental Table S2. Selected 212 accessions with country of origin and field performance over two crop season**

| S. No. | Accession identifier | Country of origin | Part of Mini Core | Mean of Summer 2011 and Rainy 2011 |                    |                               |                               |
|--------|----------------------|-------------------|-------------------|------------------------------------|--------------------|-------------------------------|-------------------------------|
|        |                      |                   |                   | Bloom (days)                       | TSW (g/1000 grain) | Fe_XRF (mg kg <sup>-1</sup> ) | Zn_XRF (mg kg <sup>-1</sup> ) |
| 83     | IP 9416              | Ghana             | NO                | 45                                 | 14                 | 70                            | 54                            |
| 84     | IP 9426              | Ghana             | NO                | 55                                 | 8                  | 56                            | 53                            |
| 85     | IP 9496              | Ghana             | NO                | 42                                 | 15                 | 74                            | 46                            |
| 86     | IP 9572              | Ghana             | NO                | 64                                 | 9                  | 45                            | 47                            |
| 87     | IP 9618              | India             | NO                | 51                                 | 6                  | 48                            | 42                            |
| 88     | IP 9678              | Nigeria           | NO                | 64                                 | 9                  | 70                            | 56                            |
| 89     | IP 9840              | Sudan             | NO                | 53                                 | 10                 | 46                            | 43                            |
| 90     | IP 9969              | Zambia            | NO                | 56                                 | 6                  | 60                            | 62                            |
| 91     | IP 9981              | Zambia            | NO                | 59                                 | 8                  | 47                            | 51                            |
| 92     | IP 10202             | Mali              | NO                | 62                                 | 9                  | 48                            | 44                            |
| 93     | IP 10290             | Nigeria           | NO                | 61                                 | 7                  | 58                            | 44                            |
| 94     | IP 10394             | India             | NO                | 51                                 | 14                 | 75                            | 47                            |
| 95     | IP 10471             | Zimbabwe          | NO                | 61                                 | 7                  | 60                            | 55                            |
| 96     | IP 10543             | Mali              | NO                | 60                                 | 10                 | 41                            | 37                            |
| 97     | IP 10694             | Mali              | NO                | 63                                 | 7                  | 39                            | 34                            |
| 98     | IP 10761             | Sudan             | YES               | 61                                 | 8                  | 39                            | 39                            |
| 99     | IP 10811             | Sudan             | NO                | 57                                 | 10                 | 69                            | 50                            |
| 100    | IP 10820             | Sudan             | NO                | 59                                 | 9                  | 41                            | 38                            |
| 101    | IP 10964             | Kenya             | NO                | 57                                 | 8                  | 69                            | 73                            |
| 102    | IP 11049             | India             | NO                | 53                                 | 6                  | 42                            | 47                            |
| 103    | IP 11316             | Burkina Faso      | NO                | 56                                 | 15                 | 63                            | 54                            |
| 104    | IP 11320             | Burkina Faso      | NO                | 47                                 | 15                 | 45                            | 43                            |
| 105    | IP 11353             | Burkina Faso      | NO                | 67                                 | 13                 | 46                            | 47                            |
| 106    | IP 11358             | Burkina Faso      | NO                | 60                                 | 7                  | 46                            | 33                            |
| 107    | IP 11391             | Burkina Faso      | NO                | 57                                 | 10                 | 39                            | 41                            |
| 108    | IP 11537             | Burkina Faso      | NO                | 53                                 | 9                  | 46                            | 38                            |
| 109    | IP 11584             | Burkina Faso      | NO                | 60                                 | 11                 | 64                            | 65                            |
| 110    | IP 11677             | Sudan             | NO                | 53                                 | 6                  | 62                            | 57                            |
| 111    | IP 11784             | India             | NO                | 51                                 | 10                 | 65                            | 51                            |
| 112    | IP 11875             | India             | NO                | 48                                 | 10                 | 57                            | 42                            |
| 113    | IP 11893             | India             | NO                | 59                                 | 10                 | 67                            | 61                            |
| 114    | IP 12020             | Nigeria           | NO                | 64                                 | 9                  | 56                            | 42                            |
| 115    | IP 12138             | Nigeria           | NO                | 67                                 | 7                  | 57                            | 51                            |
| 116    | IP 12181             | Nigeria           | NO                | 63                                 | 9                  | 57                            | 60                            |
| 117    | IP 12507             | India             | NO                | 50                                 | 10                 | 65                            | 44                            |
| 118    | IP 12627             | India             | NO                | 65                                 | 10                 | 59                            | 57                            |
| 119    | IP 12682             | India             | NO                | 58                                 | 10                 | 68                            | 50                            |
| 120    | IP 12768             | India             | NO                | 53                                 | 7                  | 70                            | 52                            |
| 121    | IP 12805             | India             | YES               | 51                                 | 8                  | 48                            | 45                            |
| 122    | IP 12901             | Cameroon          | NO                | 61                                 | 8                  | 45                            | 44                            |
| 123    | IP 12925             | Ghana             | NO                | 51                                 | 14                 | 78                            | 50                            |

**Supplemental Table S2. Selected 212 accessions with country of origin and field performance over two crop season**

| S. No. | Accession identifier | Country of origin | Part of Mini Core | Mean of Summer 2011 and Rainy 2011 |                    |                               |                               |
|--------|----------------------|-------------------|-------------------|------------------------------------|--------------------|-------------------------------|-------------------------------|
|        |                      |                   |                   | Bloom (days)                       | TSW (g/1000 grain) | Fe_XRF (mg kg <sup>-1</sup> ) | Zn_XRF (mg kg <sup>-1</sup> ) |
| 124    | IP 12939             | Ghana             | NO                | 46                                 | 13                 | 68                            | 59                            |
| 125    | IP 12967             | Malawi            | NO                | 50                                 | 7                  | 56                            | 45                            |
| 126    | IP 13137             | Niger             | NO                | 54                                 | 12                 | 38                            | 34                            |
| 127    | IP 13154             | Niger             | NO                | 62                                 | 10                 | 40                            | 39                            |
| 128    | IP 13180             | Nigeria           | NO                | 56                                 | 11                 | 56                            | 46                            |
| 129    | IP 13191             | Nigeria           | NO                | 58                                 | 12                 | 59                            | 58                            |
| 130    | IP 13290             | Senegal           | NO                | 62                                 | 8                  | 44                            | 45                            |
| 131    | IP 13384             | Uganda            | NO                | 55                                 | 11                 | 58                            | 46                            |
| 132    | IP 13565             | India             | NO                | 59                                 | 6                  | 56                            | 65                            |
| 133    | IP 13900             | Burkina Faso      | NO                | 51                                 | 12                 | 61                            | 56                            |
| 134    | IP 13971             | Zimbabwe          | NO                | 60                                 | 11                 | 46                            | 47                            |
| 135    | IP 14026             | Zimbabwe          | NO                | 53                                 | 10                 | 58                            | 49                            |
| 136    | IP 14028             | Zimbabwe          | NO                | 56                                 | 8                  | 37                            | 45                            |
| 137    | IP 14148             | Zimbabwe          | NO                | 54                                 | 10                 | 61                            | 47                            |
| 138    | IP 14210             | Cameroon          | NO                | 53                                 | 12                 | 59                            | 53                            |
| 139    | IP 14362             | Cameroon          | NO                | 64                                 | 8                  | 56                            | 64                            |
| 140    | IP 14418             | Cameroon          | NO                | 63                                 | 7                  | 42                            | 51                            |
| 141    | IP 14778             | Cameroon          | NO                | 52                                 | 11                 | 45                            | 39                            |
| 142    | IP 14942             | India             | NO                | 48                                 | 5                  | 41                            | 49                            |
| 143    | IP 14991             | India             | NO                | 51                                 | 10                 | 46                            | 50                            |
| 144    | IP 15092             | India             | NO                | 56                                 | 9                  | 70                            | 74                            |
| 145    | IP 15159             | India             | NO                | 56                                 | 8                  | 43                            | 47                            |
| 146    | IP 15177             | India             | NO                | 53                                 | 11                 | 36                            | 54                            |
| 147    | IP 15218             | India             | NO                | 63                                 | 7                  | 47                            | 60                            |
| 148    | IP 15233             | India             | NO                | 58                                 | 7                  | 45                            | 54                            |
| 149    | IP 15234             | India             | NO                | 56                                 | 8                  | 62                            | 50                            |
| 150    | IP 15257             | India             | NO                | 61                                 | 7                  | 47                            | 57                            |
| 151    | IP 15273             | India             | YES               | 49                                 | 7                  | 68                            | 42                            |
| 152    | IP 15297             | India             | NO                | 47                                 | 7                  | 53                            | 48                            |
| 153    | IP 15304             | India             | NO                | 57                                 | 6                  | 48                            | 44                            |
| 154    | IP 15372             | India             | YES               | 50                                 | 7                  | 43                            | 36                            |
| 155    | IP 15402             | India             | NO                | 54                                 | 9                  | 70                            | 50                            |
| 156    | IP 15423             | India             | NO                | 55                                 | 11                 | 46                            | 40                            |
| 157    | IP 15498             | India             | NO                | 53                                 | 11                 | 49                            | 40                            |
| 158    | IP 15614             | Burkina Faso      | NO                | 59                                 | 6                  | 63                            | 56                            |
| 159    | IP 15817             | Tanzania          | NO                | 60                                 | 9                  | 81                            | 47                            |
| 160    | IP 15872             | Tanzania          | NO                | 63                                 | 6                  | 38                            | 36                            |
| 161    | IP 15899             | Tanzania          | NO                | 58                                 | 6                  | 58                            | 54                            |
| 162    | IP 15917             | Togo              | NO                | 45                                 | 13                 | 85                            | 48                            |
| 163    | IP 16197             | India             | NO                | 48                                 | 12                 | 44                            | 38                            |
| 164    | IP 16304             | Zimbabwe          | NO                | 61                                 | 7                  | 36                            | 45                            |



**Supplemental Table S2. Selected 212 accessions with country of origin and field performance over two crop season**

| S. No. | Accession identifier | Country of origin | Part of Mini Core | Mean of Summer 2011 and Rainy 2011 |                    |                               |                               |
|--------|----------------------|-------------------|-------------------|------------------------------------|--------------------|-------------------------------|-------------------------------|
|        |                      |                   |                   | Bloom (days)                       | TSW (g/1000 grain) | Fe_XRF (mg kg <sup>-1</sup> ) | Zn_XRF (mg kg <sup>-1</sup> ) |
| 165    | IP 16380             | Zimbabwe          | NO                | 59                                 | 9                  | 47                            | 43                            |
| 166    | IP 16426             | Zimbabwe          | NO                | 62                                 | 7                  | 44                            | 44                            |
| 167    | IP 16449             | Zimbabwe          | NO                | 43                                 | 11                 | 56                            | 51                            |
| 168    | IP 16617             | Zimbabwe          | NO                | 57                                 | 10                 | 58                            | 53                            |
| 169    | IP 16770             | Zimbabwe          | NO                | 54                                 | 9                  | 64                            | 49                            |
| 170    | IP 16911             | Zimbabwe          | NO                | 58                                 | 9                  | 56                            | 53                            |
| 171    | IP 17028             | Zimbabwe          | NO                | 58                                 | 10                 | 59                            | 58                            |
| 172    | IP 17064             | Zimbabwe          | NO                | 58                                 | 10                 | 64                            | 61                            |
| 173    | IP 17125             | Zimbabwe          | NO                | 58                                 | 7                  | 40                            | 49                            |
| 174    | IP 17217             | Burkina Faso      | NO                | 60                                 | 9                  | 66                            | 65                            |
| 175    | IP 17554             | Togo              | NO                | 44                                 | 13                 | 59                            | 36                            |
| 176    | IP 17566             | Togo              | NO                | 41                                 | 14                 | 66                            | 49                            |
| 177    | IP 17620             | Togo              | NO                | 53                                 | 13                 | 88                            | 59                            |
| 178    | IP 17632             | Togo              | NO                | 41                                 | 14                 | 57                            | 39                            |
| 179    | IP 17690             | Togo              | NO                | 53                                 | 14                 | 82                            | 57                            |
| 180    | IP 17707             | Togo              | NO                | 50                                 | 12                 | 76                            | 54                            |
| 181    | IP 17878             | India             | NO                | 50                                 | 13                 | 80                            | 55                            |
| 182    | IP 17978             | India             | NO                | 47                                 | 12                 | 64                            | 55                            |
| 183    | IP 18246             | India             | NO                | 59                                 | 7                  | 68                            | 68                            |
| 184    | IP 18281             | India             | NO                | 58                                 | 11                 | 56                            | 48                            |
| 185    | IP 18389             | Namibia           | NO                | 55                                 | 13                 | 58                            | 51                            |
| 186    | IP 18421             | Namibia           | NO                | 58                                 | 10                 | 54                            | 51                            |
| 187    | IP 18500             | Namibia           | NO                | 60                                 | 10                 | 45                            | 41                            |
| 188    | IP 18621             | Namibia           | NO                | 63                                 | 8                  | 44                            | 43                            |
| 189    | IP 18657             | Namibia           | YES               | 51                                 | 6                  | 45                            | 47                            |
| 190    | IP 18679             | Namibia           | NO                | 60                                 | 8                  | 43                            | 45                            |
| 191    | IP 18702             | Namibia           | NO                | 58                                 | 9                  | 39                            | 38                            |
| 192    | IP 18722             | Namibia           | NO                | 60                                 | 8                  | 52                            | 50                            |
| 193    | IP 18742             | Namibia           | NO                | 48                                 | 10                 | 55                            | 46                            |
| 194    | IP 18780             | Namibia           | NO                | 61                                 | 8                  | 45                            | 43                            |
| 195    | IP 18786             | Namibia           | NO                | 65                                 | 8                  | 57                            | 53                            |
| 196    | IP 18797             | Namibia           | NO                | 61                                 | 8                  | 57                            | 54                            |
| 197    | IP 18910             | Namibia           | NO                | 55                                 | 10                 | 66                            | 52                            |
| 198    | IP 19040             | Namibia           | NO                | 66                                 | 8                  | 44                            | 44                            |
| 199    | IP 19067             | Namibia           | NO                | 61                                 | 9                  | 42                            | 40                            |
| 200    | IP 19072             | Namibia           | YES               | 58                                 | 7                  | 43                            | 37                            |
| 201    | IP 19078             | Namibia           | NO                | 57                                 | 7                  | 34                            | 30                            |
| 202    | IP 19141             | Namibia           | YES               | 51                                 | 9                  | 40                            | 43                            |
| 203    | IP 19175             | Namibia           | NO                | 56                                 | 12                 | 51                            | 51                            |
| 204    | IP 19190             | Namibia           | NO                | 56                                 | 14                 | 64                            | 49                            |
| 205    | IP 19215             | Namibia           | NO                | 60                                 | 8                  | 56                            | 52                            |

**Supplimental Table S2. Selected 212 accessions with country of origin and field performance over two crop season**

| S. No. | Accession identifier | Country of origin | Part of Mini Core | Mean of Summer 2011 and Rainy 2011 |                    |                               |                               |
|--------|----------------------|-------------------|-------------------|------------------------------------|--------------------|-------------------------------|-------------------------------|
|        |                      |                   |                   | Bloom (days)                       | TSW (g/1000 grain) | Fe_XRF (mg kg <sup>-1</sup> ) | Zn_XRF (mg kg <sup>-1</sup> ) |
| 206    | IP 19229             | Namibia           | NO                | 67                                 | 8                  | 48                            | 47                            |
| 207    | IP 19263             | Namibia           | NO                | 58                                 | 11                 | 41                            | 39                            |
| 208    | IP 19299             | Namibia           | NO                | 66                                 | 9                  | 47                            | 40                            |
| 209    | IP 19305             | Namibia           | YES               | 68                                 | 8                  | 46                            | 43                            |
| 210    | IP 19344             | Namibia           | NO                | 62                                 | 9                  | 37                            | 37                            |
| 211    | IP 19388             | Namibia           | NO                | 70                                 | 8                  | 51                            | 49                            |
| 212    | IP 19405             | Chad              | NO                | 56                                 | 10                 | 59                            | 57                            |
|        |                      |                   | MEAN              | 56                                 | 9                  | 54                            | 49                            |
|        |                      |                   | Mean exceed       | 97                                 | 85                 | 102                           | 90                            |

Supplimental Table S3. Selected 39 accessions with country of origin, field performance and mineral nutrients (ICP data) across two crop seasons

| S. No. | Accession identifier | Country of origin | Part of Mini Core | Mean of Summer 2011 and Rainy 2011 seasons |                      |                           |                           |                           |                           |                           |                           |                           |                           |                           |                          |                          |                          |
|--------|----------------------|-------------------|-------------------|--------------------------------------------|----------------------|---------------------------|---------------------------|---------------------------|---------------------------|---------------------------|---------------------------|---------------------------|---------------------------|---------------------------|--------------------------|--------------------------|--------------------------|
|        |                      |                   |                   | Bloom (days)                               | TSW (g/ 1000 grains) | Fe (mg kg <sup>-1</sup> ) | Zn (mg kg <sup>-1</sup> ) | Mn (mg kg <sup>-1</sup> ) | Cu (mg kg <sup>-1</sup> ) | Mo (mg kg <sup>-1</sup> ) | Ni (mg kg <sup>-1</sup> ) | Ca (mg kg <sup>-1</sup> ) | Mg (mg kg <sup>-1</sup> ) | Na (mg kg <sup>-1</sup> ) | K (mg kg <sup>-1</sup> ) | P (mg kg <sup>-1</sup> ) | S (mg kg <sup>-1</sup> ) |
| 1      | IP 3329              | India             | YES               | 60                                         | 7                    | 78                        | 62                        | 14                        | 7.3                       | 1.9                       | 1.4                       | 155                       | 1438                      | 14                        | 4800                     | 4400                     | 1533                     |
| 2      | IP 3626              | India             | YES               | 52                                         | 9                    | 74                        | 56                        | 11                        | 6.6                       | 1.5                       | 1.2                       | 161                       | 1453                      | 10                        | 3767                     | 3800                     | 1480                     |
| 3      | IP 3749              | India             | NO                | 58                                         | 9                    | 68                        | 61                        | 12                        | 5.2                       | 1.9                       | 1.0                       | 140                       | 1335                      | 13                        | 3433                     | 3550                     | 1453                     |
| 4      | IP 4454              | India             | NO                | 56                                         | 8                    | 70                        | 58                        | 12                        | 5.1                       | 1.5                       | 1.4                       | 85                        | 1420                      | 11                        | 3375                     | 3400                     | 1530                     |
| 5      | IP 5316              | Niger             | NO                | 57                                         | 11                   | 66                        | 50                        | 15                        | 5.1                       | 1.0                       | 1.1                       | 201                       | 1240                      | 8                         | 4400                     | 3667                     | 1413                     |
| 6      | IP 7208              | India             | NO                | 53                                         | 7                    | 70                        | 53                        | 15                        | 6.4                       | 1.5                       | 1.7                       | 162                       | 1627                      | 15                        | 4100                     | 4100                     | 1460                     |
| 7      | IP 7536              | India             | NO                | 58                                         | 7                    | 78                        | 56                        | 17                        | 5.9                       | 1.2                       | 0.8                       | 204                       | 1523                      | 13                        | 4367                     | 4200                     | 1577                     |
| 8      | IP 7838              | India             | NO                | 52                                         | 9                    | 67                        | 56                        | 12                        | 5.9                       | 1.4                       | 1.4                       | 196                       | 1373                      | 11                        | 3800                     | 3600                     | 1543                     |
| 9      | IP 8972              | Togo              | NO                | 46                                         | 11                   | 93                        | 47                        | 16                        | 5.9                       | 1.0                       | 1.9                       | 180                       | 1377                      | 16                        | 4433                     | 3700                     | 1303                     |
| 10     | IP 9301              | Togo              | NO                | 49                                         | 14                   | 83                        | 55                        | 13                        | 5.9                       | 1.0                       | 1.8                       | 192                       | 1220                      | 13                        | 4400                     | 3433                     | 1253                     |
| 11     | IP 9351              | Ghana             | NO                | 46                                         | 14                   | 69                        | 49                        | 14                        | 6.9                       | 0.6                       | 1.1                       | 229                       | 1127                      | 13                        | 3500                     | 3125                     | 1303                     |
| 12     | IP 9407              | Ghana             | NO                | 45                                         | 13                   | 62                        | 43                        | 14                        | 5.4                       | 1.3                       | 0.9                       | 201                       | 1243                      | 14                        | 4233                     | 3467                     | 1280                     |
| 13     | IP 9416              | Ghana             | NO                | 45                                         | 14                   | 75                        | 55                        | 15                        | 5.7                       | 1.3                       | 0.9                       | 240                       | 1257                      | 13                        | 4050                     | 3450                     | 1255                     |
| 14     | IP 9496              | Ghana             | NO                | 42                                         | 15                   | 68                        | 44                        | 13                        | 5.1                       | 1.0                       | 1.4                       | 155                       | 1133                      | 20                        | 3875                     | 3150                     | 1243                     |
| 15     | IP 9572              | Ghana             | NO                | 64                                         | 10                   | 52                        | 46                        | 16                        | 6.1                       | 1.3                       | 1.5                       | 164                       | 1740                      | 20                        | 5133                     | 4733                     | 1703                     |
| 16     | IP 10394             | India             | NO                | 51                                         | 14                   | 88                        | 52                        | 16                        | 6.5                       | 1.1                       | 1.3                       | 201                       | 1263                      | 15                        | 3900                     | 3350                     | 1300                     |
| 17     | IP 10471             | Zimbabwe          | NO                | 61                                         | 9                    | 72                        | 61                        | 12                        | 5.4                       | 1.8                       | 0.9                       | 105                       | 1390                      | 12                        | 4967                     | 4033                     | 1455                     |
| 18     | IP 11316             | Burkina Faso      | NO                | 56                                         | 16                   | 67                        | 57                        | 13                        | 4.1                       | 1.7                       | 0.7                       | 150                       | 1213                      | 14                        | 4600                     | 3575                     | 1183                     |
| 19     | IP 11320             | Burkina Faso      | NO                | 47                                         | 15                   | 50                        | 40                        | 12                        | 4.0                       | 1.2                       | 0.9                       | 148                       | 1130                      | 16                        | 4267                     | 3200                     | 1123                     |
| 20     | IP 11353             | Burkina Faso      | NO                | 67                                         | 12                   | 53                        | 48                        | 11                        | 5.9                       | 1.7                       | 1.2                       | 162                       | 1318                      | 12                        | 4500                     | 3675                     | 1355                     |
| 21     | IP 11584             | Burkina Faso      | NO                | 60                                         | 11                   | 76                        | 65                        | 14                        | 5.5                       | 2.2                       | 1.4                       | 208                       | 1333                      | 16                        | 4825                     | 3650                     | 1353                     |
| 22     | IP 11784             | India             | NO                | 51                                         | 10                   | 71                        | 62                        | 12                        | 4.6                       | 1.7                       | 0.9                       | 160                       | 1147                      | 13                        | 3167                     | 2900                     | 1467                     |
| 23     | IP 12181             | Nigeria           | NO                | 63                                         | 9                    | 76                        | 64                        | 14                        | 5.0                       | 0.9                       | 1.1                       | 176                       | 1293                      | 10                        | 3975                     | 3550                     | 1438                     |
| 24     | IP 12507             | India             | NO                | 51                                         | 10                   | 76                        | 42                        | 12                        | 6.7                       | 1.5                       | 1.2                       | 128                       | 1405                      | 15                        | 4775                     | 4100                     | 1583                     |
| 25     | IP 12682             | India             | NO                | 54                                         | 11                   | 82                        | 57                        | 10                        | 7.2                       | 1.5                       | 0.7                       | 119                       | 1317                      | 13                        | 4900                     | 4033                     | 1237                     |
| 26     | IP 12939             | Ghana             | NO                | 43                                         | 13                   | 66                        | 55                        | 13                        | 6.0                       | 1.0                       | 0.9                       | 159                       | 1213                      | 14                        | 3825                     | 3375                     | 1245                     |
| 27     | IP 13384             | Uganda            | NO                | 55                                         | 11                   | 48                        | 33                        | 17                        | 7.1                       | 1.2                       | 0.8                       | 91                        | 1275                      | 9                         | 3400                     | 3500                     | 1268                     |
| 28     | IP 13900             | Burkina Faso      | NO                | 51                                         | 12                   | 63                        | 58                        | 13                        | 6.3                       | 1.7                       | 1.4                       | 138                       | 1223                      | 15                        | 3650                     | 3433                     | 1278                     |
| 29     | IP 14148             | Zimbabwe          | NO                | 59                                         | 10                   | 69                        | 55                        | 12                        | 5.3                       | 1.2                       | 0.9                       | 205                       | 1307                      | 13                        | 4667                     | 4100                     | 1298                     |
| 30     | IP 15402             | India             | NO                | 54                                         | 8                    | 72                        | 45                        | 16                        | 5.7                       | 1.4                       | 1.2                       | 249                       | 1343                      | 13                        | 4125                     | 3550                     | 1323                     |
| 31     | IP 15614             | Burkina Faso      | NO                | 59                                         | 6                    | 71                        | 61                        | 17                        | 7.5                       | 1.8                       | 1.1                       | 229                       | 1837                      | 22                        | 4633                     | 4500                     | 1523                     |
| 32     | IP 15817             | Tanzania          | NO                | 60                                         | 10                   | 78                        | 48                        | 14                        | 5.8                       | 1.1                       | 1.2                       | 138                       | 1380                      | 17                        | 4350                     | 3325                     | 1220                     |
| 33     | IP 17217             | Burkina Faso      | NO                | 59                                         | 9                    | 64                        | 59                        | 16                        | 5.6                       | 2.2                       | 1.3                       | 179                       | 1613                      | 14                        | 4400                     | 4025                     | 1638                     |
| 34     | IP 17554             | Togo              | NO                | 44                                         | 13                   | 53                        | 33                        | 14                        | 3.7                       | 0.9                       | 1.0                       | 140                       | 1207                      | 14                        | 4033                     | 3067                     | 1150                     |
| 35     | IP 17566             | Togo              | NO                | 41                                         | 14                   | 68                        | 50                        | 13                        | 5.9                       | 1.2                       | 1.4                       | 167                       | 1230                      | 15                        | 3775                     | 3325                     | 1305                     |
| 36     | IP 17620             | Togo              | NO                | 53                                         | 13                   | 91                        | 57                        | 16                        | 3.9                       | 0.7                       | 1.3                       | 212                       | 1327                      | 18                        | 3867                     | 3300                     | 1195                     |
| 37     | IP 17690             | Togo              | NO                | 53                                         | 14                   | 78                        | 53                        | 11                        | 5.6                       | 1.5                       | 1.1                       | 189                       | 1167                      | 10                        | 3933                     | 3400                     | 1293                     |
| 38     | IP 17707             | Togo              | NO                | 53                                         | 12                   | 82                        | 51                        | 17                        | 6.1                       | 1.3                       | 1.1                       | 235                       | 1280                      | 18                        | 4400                     | 3650                     | 1400                     |
| 39     | IP 17878             | India             | NO                | 50                                         | 13                   | 70                        | 56                        | 14                        | 6.3                       | 1.1                       | 1.2                       | 175                       | 1358                      | 13                        | 4200                     | 3750                     | 1358                     |
|        |                      |                   | Mean              | 53                                         | 11                   | 71                        | 53                        | 14                        | 6                         | 1                         | 1                         | 173                       | 1335                      | 14                        | 4174                     | 3645                     | 1367                     |

**Supplemental Table S4. Clustering of 212 core collection accessions based on evaluation in the two seasons, ICRISAT Center, Patancheru**

| Clusters  | Number of accessions | IP Nos                                         |      | 50% flower TSW (g) | Fe (ppm) | Zn   |      |
|-----------|----------------------|------------------------------------------------|------|--------------------|----------|------|------|
| Cluster-1 | 32                   | 3106 3296 3626 3749 3799 4197 4454 5070 5316   | Min  | 50                 | 7        | 50   | 47   |
|           |                      | 6584 7208 7734 7838 8426 9286 10811 11584      | Max  | 66                 | 13       | 83   | 66   |
|           |                      | 11784 11893 12682 12768 13191 14210 15402      | Mean | 56                 | 10       | 65   | 55   |
|           |                      | 15817 16617 16770 17028 17064 18389 18910      |      | bc                 | c        | a    | b    |
|           |                      | 19405                                          | SE   | 0.59               | 0.24     | 1.27 | 1.01 |
| Cluster-2 | 42                   | 3122 3138 3183 3284 3890 4466 4695 4974 5272   | Min  | 48                 | 5        | 34   | 30   |
|           |                      | 5695 7377 7440 7762 8074 8409 8562 8593 9618   | Max  | 63                 | 11       | 50   | 49   |
|           |                      | 10543 10694 10761 10820 11049 11358 11391      | Mean | 56                 | 8        | 42   | 40   |
|           |                      | 11537 13154 14028 14942 15159 15372 15872      |      | bc                 | de       | d    | d    |
|           |                      | 16380 18500 18657 18702 19067 19072 19078      | SE   | 0.64               | 0.19     | 0.63 | 0.71 |
| Cluster-3 | 26                   | 3163 4759 4779 4828 4979 5131 5222 6013 6639   | Min  | 47                 | 7        | 36   | 42   |
|           |                      | 6793 7020 7660 8867 11353 12967 13180 13384    | Max  | 67                 | 13       | 68   | 54   |
|           |                      | 13971 14026 14148 14991 15177 15273 15297      | Mean | 54                 | 10       | 53   | 47   |
|           |                      | 18281 19175                                    |      | c                  | cd       | bc   | c    |
|           |                      |                                                | SE   | 0.8                | 0.34     | 1.24 | 0.5  |
| Cluster-4 | 7                    |                                                | Min  | 56                 | 7        | 57   | 61   |
|           |                      |                                                | Max  | 61                 | 9        | 75   | 74   |
|           |                      | 3329 4747 6869 10964 15092 17217 18246         | Mean | 59                 | 8        | 68   | 68   |
|           |                      |                                                |      | ab                 | de       | a    | a    |
|           |                      |                                                | SE   | 0.74               | 0.34     | 2.15 | 1.66 |
| Cluster-5 | 32                   | 3432 4542 5056 7108 7118 7470 7536 8344 8429   | Min  | 50                 | 6        | 44   | 47   |
|           |                      | 8564 9140 9426 9678 9969 10471 11677 12138     | Max  | 70                 | 10       | 72   | 65   |
|           |                      | 12181 12627 13565 14362 15218 15234 15257      | Mean | 59                 | 8        | 57   | 55   |
|           |                      | 15614 15899 16911 18421 18786 18797 19215      |      | ab                 | e        | b    | b    |
|           |                      | 19388                                          | SE   | 0.77               | 0.2      | 1.04 | 0.85 |
| Cluster-6 | 29                   | 3865 4499 5031 6682 6882 6897 8069 8863 9572   | Min  | 55                 | 6        | 35   | 40   |
|           |                      | 9981 10202 10290 12020 12901 13290 14418 15233 | Max  | 69                 | 9        | 58   | 56   |
|           |                      | 15304 16304 16426 17125 18621 18679 18722      | Mean | 62                 | 8        | 45   | 46   |
|           |                      | 18780 19040 19229 19299 19305                  |      | a                  | e        | cd   | c    |
|           |                      |                                                | SE   | 0.61               | 0.16     | 0.91 | 0.7  |
| Cluster-7 | 23                   |                                                | Min  | 41                 | 8        | 38   | 34   |
|           |                      | 3999 4120 4291 4962 5045 5666 6530 7633 8208   | Max  | 55                 | 15       | 65   | 48   |
|           |                      | 8339 9840 11320 11875 12507 12805 13137 14778  | Mean | 50                 | 11       | 50   | 42   |
|           |                      | 15423 15498 16197 17554 17632 18742            |      | d                  | b        | bcd  | cd   |
|           |                      |                                                | SE   | 0.76               | 0.35     | 1.41 | 0.67 |
| Cluster-8 | 21                   |                                                | Min  | 41                 | 11       | 56   | 46   |
|           |                      | 6745 8972 9301 9351 9407 9416 9496 10394 11316 | Max  | 56                 | 15       | 90   | 59   |
|           |                      | 12925 12939 13900 15917 16449 17566 17620      | Mean | 48                 | 13       | 72   | 52   |
|           |                      | 17690 17707 17878 17978 19190                  |      | d                  | a        | a    | b    |
|           |                      |                                                | SE   | 0.95               | 0.29     | 2.17 | 0.92 |

Cluster means with similar alphabets not differ significant for that trait as per SNK test

SE- Standard error

**Supplemental Table S5. Clustering of 39 core collection accessions based on evaluation in the two seasons, ICRISAT Center, Patancheru, India.**

| Cluster   | # Geno IP Nos | Promising IP Nos                                                   | Bloom (d)                        | TSW  | (Fe) | Zn  | Mn  | Cu  | Mo  | Ni   | Ca   | Mg   | Na  | K    | P   | S    |      |      |   |
|-----------|---------------|--------------------------------------------------------------------|----------------------------------|------|------|-----|-----|-----|-----|------|------|------|-----|------|-----|------|------|------|---|
| Cluster 1 | 7             | 3329 7208 7536 9572<br>12507 15614 17217                           | 3329, 15614, 7536 and<br>17217   | Min  | 51   | 6   | 52  | 42  | 12  | 5.6  | 1.21 | 0.84 | 128 | 1405 | 13  | 4100 | 4025 | 1460 |   |
|           |               |                                                                    |                                  | Max  | 64   | 10  | 78  | 62  | 17  | 7.5  | 2.17 | 1.67 | 229 | 1837 | 22  | 5133 | 4733 | 1703 |   |
|           |               |                                                                    |                                  | Mean | 58   | 8   | 70  | 54  | 15  | 6.5  | 1.64 | 1.29 | 175 | 1597 | 16  | 4601 | 4294 | 1574 |   |
|           |               |                                                                    |                                  |      | ab   | c   | b   | a   | a   | a    | a    | a    | ab  | a    | a   | a    | a    | a    | a |
|           |               |                                                                    |                                  | SE   | 1.7  | 0.6 | 3.6 | 2.9 | 0.6 | 0.26 | 0.13 | 0.1  | 13  | 59   | 1.3 | 129  | 98   | 30   |   |
| Cluster 2 | 11            | 3626 3749 4454 5316<br>7838 11784 12181 13900<br>15817 17690 17878 | Low-Fe genotypes                 | Min  | 50   | 8   | 63  | 48  | 11  | 4.63 | 0.89 | 0.88 | 85  | 1147 | 8   | 3167 | 2900 | 1220 |   |
|           |               |                                                                    |                                  | Max  | 63   | 14  | 78  | 64  | 15  | 6.61 | 1.95 | 1.4  | 201 | 1453 | 17  | 4400 | 3800 | 1543 |   |
|           |               |                                                                    |                                  | Mean | 55   | 10  | 71  | 56  | 13  | 5.59 | 1.41 | 1.18 | 160 | 1308 | 12  | 3823 | 3489 | 1407 |   |
|           |               |                                                                    |                                  |      | ab   | b   | b   | a   | b   | a    | ab   | a    | b   | b    | a   | b    | bc   | b    |   |
|           |               |                                                                    |                                  | SE   | 1.3  | 0.6 | 1.5 | 1.5 | 0.4 | 0.2  | 0.1  | 0.05 | 10  | 31   | 0.8 | 121  | 74   | 32   |   |
| Cluster 3 | 7             | 8972 9301 9416 10394<br>15402 17620 17707                          | 8972, 15402, 17707<br>and 17620  | Min  | 45   | 8   | 72  | 45  | 13  | 3.91 | 0.72 | 0.91 | 180 | 1220 | 13  | 3867 | 3300 | 1195 |   |
|           |               |                                                                    |                                  | Max  | 54   | 14  | 93  | 57  | 17  | 6.49 | 1.44 | 1.91 | 249 | 1377 | 18  | 4433 | 3700 | 1400 |   |
|           |               |                                                                    |                                  | Mean | 50   | 12  | 83  | 52  | 16  | 5.67 | 1.11 | 1.36 | 216 | 1295 | 15  | 4168 | 3490 | 1290 |   |
|           |               |                                                                    |                                  |      | bc   | ab  | a   | a   | a   | a    | b    | a    | a   | b    | a   | ab   | bc   | bc   |   |
|           |               |                                                                    |                                  | SE   | 1.3  | 0.8 | 3   | 1.6 | 0.5 | 0.31 | 0.09 | 0.14 | 10  | 21   | 0.9 | 92   | 56   | 24   |   |
| Cluster 4 | 8             | 9351 9407 9496 11320<br>12939 13384 17554<br>17566                 | 9351, 17566, 9496 and<br>9407    | Min  | 41   | 11  | 48  | 33  | 12  | 3.68 | 0.61 | 0.75 | 91  | 1127 | 9   | 3400 | 3067 | 1123 |   |
|           |               |                                                                    |                                  | Max  | 55   | 15  | 69  | 55  | 17  | 7.05 | 1.34 | 1.44 | 229 | 1275 | 20  | 4267 | 3500 | 1305 |   |
|           |               |                                                                    |                                  | Mean | 45   | 14  | 61  | 43  | 14  | 5.51 | 1.04 | 1.04 | 161 | 1195 | 14  | 3864 | 3276 | 1239 |   |
|           |               |                                                                    |                                  |      | c    | a   | b   | b   | ab  | a    | b    | a    | b   | b    | a   | b    | c    | c    |   |
|           |               |                                                                    |                                  | SE   | 1.5  | 0.5 | 3.1 | 2.8 | 0.5 | 0.44 | 0.08 | 0.09 | 15  | 20   | 1   | 111  | 58   | 24   |   |
| Cluster 5 | 6             | 10471 11316 11353<br>11584 12682 14148                             | 12682, 11584, 10471<br>and 14148 | Min  | 54   | 9   | 53  | 48  | 10  | 4.14 | 1.21 | 0.68 | 105 | 1213 | 12  | 4500 | 3575 | 1183 |   |
|           |               |                                                                    |                                  | Max  | 67   | 16  | 82  | 65  | 14  | 7.16 | 2.23 | 1.44 | 208 | 1390 | 16  | 4967 | 4100 | 1455 |   |
|           |               |                                                                    |                                  | Mean | 59   | 12  | 70  | 57  | 12  | 5.58 | 1.7  | 0.98 | 158 | 1313 | 13  | 4743 | 3844 | 1313 |   |
|           |               |                                                                    |                                  |      | a    | ab  | b   | a   | b   | a    | a    | a    | b   | b    | a   | a    | b    | bc   |   |
|           |               |                                                                    |                                  | SE   | 1.8  | 1   | 4   | 2.3 | 0.6 | 0.4  | 0.14 | 0.12 | 17  | 23   | 0.6 | 75   | 96   | 39   |   |

Cluster means with similar alphabets not differ significant for that trait
